# Supplementary material
Source: HighWire-hosted journal article supplement (https://bmjopen.bmj.com/content/9/9/e031504)
Supplement: inline-supplementary-material-2 [file inline-supplementary-material-2.pdf]

Supplementary file, INACTIC

Search strategy INACTIC

**PubMed, search terms: PubMed – 16-01-2019**

**PPC 1(PICO 1)**

| Participants |                                                                   | Phenomenon of Interest                                                                                                                                                                            | Context                                                                                                               |
|--------------|-------------------------------------------------------------------|---------------------------------------------------------------------------------------------------------------------------------------------------------------------------------------------------|-----------------------------------------------------------------------------------------------------------------------|
| #1           | #2                                                                | #3                                                                                                                                                                                                | #4                                                                                                                    |
| Nurs*[tw]    | Advanced[tw]<br>Expert*[tw]<br>Practitioner*[tw]<br>Speciali*[tw] | Case-load*[tw]<br>Caseload*[tw]<br>Competenc*[tw]<br>Curriculum*[tw]<br>Education*[tw]<br>Knowledge[tw]<br>Legislation*[tw]<br>"Policies"[tw]<br>"Policy"[tw]<br>Qualification*[tw]<br>Skill*[tw] | "Critical care"[tw]<br>"Critical nursing care"[tw]<br>ICU[tw]<br>"Intensive care"[tw]<br>"Intensive nursing care"[tw] |

#1 AND #2 AND #3 AND #4

Nurs\*[tw] AND (Advanced [tw] OR Expert\*[tw] OR Practitioner\*[tw] OR Speciali\*[tw]) AND (Case-load\*[tw] OR Caseload\*[tw] OR Competenc\*[tw] OR Curriculum\*[tw] OR Education\*[tw] OR Knowledge[tw] OR Legislation\*[tw] OR "Policies"[tw] OR "Policy"[tw] OR Qualification\*[tw] OR Skill\*[tw]) AND ("Critical care"[tw] OR "Critical nursing care"[tw] OR ICU[tw] OR "Intensive care"[tw] OR "Intensive nursing care"[tw])

= 1914

**PPC 2 (PICO 2)**

| Participants                                                                                                                                                                                                                                                           |                                                                                                                                                                                                   | Phenomenon of Interest                                                                                                | Context |
|------------------------------------------------------------------------------------------------------------------------------------------------------------------------------------------------------------------------------------------------------------------------|---------------------------------------------------------------------------------------------------------------------------------------------------------------------------------------------------|-----------------------------------------------------------------------------------------------------------------------|---------|
| #1                                                                                                                                                                                                                                                                     | #2                                                                                                                                                                                                | #3                                                                                                                    | #3      |
| Advanced critical care practi*[tw]<br>Advanced nursing practi*[tw]<br>Advanced nurse practi*[tw]<br>Advanced practice nurs*[tw]<br>Expert critical care nurs*[tw]<br>Nurse practitioner*[tw]<br>Nurse specialist*[tw]<br>Specialist nurs*[tw]<br>Specialized nurs*[tw] | Case-load*[tw]<br>Caseload*[tw]<br>Competenc*[tw]<br>Curriculum*[tw]<br>Education*[tw]<br>Knowledge[tw]<br>Legislation*[tw]<br>"Policies"[tw]<br>"Policy"[tw]<br>Qualification*[tw]<br>Skill*[tw] | "Critical care"[tw]<br>"Critical nursing care"[tw]<br>ICU[tw]<br>"Intensive care"[tw]<br>"Intensive nursing care"[tw] |         |

#1 AND #2 AND #3

(Advanced critical care practi\*[tw] OR Advanced nursing practi\*[tw] OR Advanced practice nurs\*[tw] OR Advanced nurse practi\*[tw] OR Expert critical care nurs\*[tw] OR Nurse practitioner\*[tw] OR Nurse specialist\*[tw] OR Specialist nurs\*[tw] OR Specialized nurs\*[tw]) AND (Case-load\*[tw] OR Caseload\*[tw] OR Competenc\*[tw] OR Curriculum\*[tw] OR Education\*[tw] OR Knowledge[tw] OR Legislation\*[tw] OR "Policies"[tw] OR "Policy"[tw] OR Qualification\*[tw] OR Skill\*[tw]) AND ("Critical care"[tw] OR "Critical nursing care"[tw] OR ICU[tw] OR "Intensive care"[tw] OR "Intensive nursing care"[tw])

Supplementary file, INACTIC

= 596

### Summery

PICo1 = 1914

PICo2 = 596

PICo1 OR PICo2 = 1923

**(PICo1 OR PICo2) AND ("1992/01/01"[pdat] : "2019/12/31"[pdat]) = 1775**

PICo1 NOT PICo2 = 1327

PICo2 NOT PICo1 = 9

### Text Words [TW]

Includes all words and numbers in the title, abstract, other abstract, MeSH terms, MeSH Subheadings, Publication Types, Substance Names, Personal Name as Subject, Corporate Author, Secondary Source, Comment/Correction Notes, and Other Terms (see Other Term [OT] above) typically non-MeSH subject terms (keywords), including NASA Space Flight Mission, assigned by an organization other than NLM.

[https://www.ncbi.nlm.nih.gov/books/NBK3827/#pubmedhelp.Text\\_Words\\_TW](https://www.ncbi.nlm.nih.gov/books/NBK3827/#pubmedhelp.Text_Words_TW)

## EMBASE – 20-12-2018

### PICo 1

| Participants |                                                                   | Phenomenon of Interest                                                                                                                                                                            | Context                                                                                                               |
|--------------|-------------------------------------------------------------------|---------------------------------------------------------------------------------------------------------------------------------------------------------------------------------------------------|-----------------------------------------------------------------------------------------------------------------------|
| #1           | #2                                                                | #3                                                                                                                                                                                                | #4                                                                                                                    |
| Nurs*.mp.    | Advanced.mp.<br>Expert*.mp.<br>Practitioner*.mp.<br>Speciali*.mp. | Case-load*.mp.<br>Caseload*.mp.<br>Competenc*.mp.<br>Curriculum*.mp.<br>Education*.mp.<br>Knowledge.mp.<br>Legislation*.mp.<br>"Policies".mp.<br>"Policy".mp.<br>Qualification*.mp.<br>Skill*.mp. | "Critical care".mp.<br>"Critical nursing care".mp.<br>ICU.mp.<br>"Intensive care".mp.<br>"Intensive nursing care".mp. |

### #1 AND #2 AND #3 AND #4

Nurs\*.mp. AND (Advanced .mp. OR Expert\*.mp. OR Practitioner\*.mp. OR Speciali\*.mp.) AND (Case-load\*.mp. OR Caseload\*.mp. OR Competenc\*.mp. OR Curriculum\*.mp. OR Education\*.mp. OR Knowledge.mp. OR Legislation\*.mp. OR "Policies".mp. OR "Policy".mp. OR Qualification\*.mp. OR Skill\*.mp.) AND ("Critical care".mp. OR "Critical nursing care".mp. OR ICU.mp. OR "Intensive care".mp. OR "Intensive nursing care".mp.)

= 3248

### PICo 2

| Participants | Phenomenon of Interest | Context |
|--------------|------------------------|---------|
| #1           | #2                     | #3      |
|              |                        |         |

## Supplementary file, INACTIC

|                                                                                                                                                                                                                                                                        |                                                                                                                                                                                                   |                                                                                                                       |
|------------------------------------------------------------------------------------------------------------------------------------------------------------------------------------------------------------------------------------------------------------------------|---------------------------------------------------------------------------------------------------------------------------------------------------------------------------------------------------|-----------------------------------------------------------------------------------------------------------------------|
| Advanced critical care practi*.mp.<br>Advanced nursing practi*.mp.<br>Advanced nurse practi*.mp.<br>Advanced practice nurs*.mp.<br>Expert critical care nurs*.mp.<br>Nurse practitioner*.mp.<br>Nurse specialist*.mp.<br>Specialist nurs*.mp.<br>Specialized nurs*.mp. | Case-load*.mp.<br>Caseload*.mp.<br>Competenc*.mp.<br>Curriculum*.mp.<br>Education*.mp.<br>Knowledge.mp.<br>Legislation*.mp.<br>"Policies".mp.<br>"Policy".mp.<br>Qualification*.mp.<br>Skill*.mp. | "Critical care".mp.<br>"Critical nursing care".mp.<br>ICU.mp.<br>"Intensive care".mp.<br>"Intensive nursing care".mp. |
|------------------------------------------------------------------------------------------------------------------------------------------------------------------------------------------------------------------------------------------------------------------------|---------------------------------------------------------------------------------------------------------------------------------------------------------------------------------------------------|-----------------------------------------------------------------------------------------------------------------------|

## #1 AND #2 AND #3

(Advanced critical care practi\*.mp. OR Advanced nursing practi\*.mp. OR Advanced practice nurs\*.mp. OR Advanced nurse practi\*.mp. OR Expert critical care nurs\*.mp. OR Nurse practitioner\*.mp. OR Nurse specialist\*.mp. OR Specialist nurs\*.mp. OR Specialized nurs\*.mp.) AND (Case-load\*.mp. OR Caseload\*.mp. OR Competenc\*.mp. OR Curriculum\*.mp. OR Education\*.mp. OR Knowledge.mp. OR Legislation\*.mp. OR "Policies".mp. OR "Policy".mp. OR Qualification\*.mp. OR Skill\*.mp.) AND ("Critical care".mp. OR "Critical nursing care".mp. OR ICU.mp. OR "Intensive care".mp. OR "Intensive nursing care".mp.)  
= 998

**Summery**

PICo1 = 3248

PICo2 = 998

PICo1 OR PICo2 = 3251

(PICo1 OR PICo2) AND limit 3 to yr="1992 -Current" = 3117

PICo1 NOT PICo2 = 2253

PICo2 NOT PICo1 = 3

-----  
mp=title, abstract, heading word, drug trade name, original title, device manufacturer, drug manufacturer, device trade name, keyword, floating subheading word, candidate term word

**PsychINFO, EBSCOhost – 16-01-2019****PICo 1**

| Participants |                                                   | Phenomenon of Interest                                                          | Context                                                                                           |
|--------------|---------------------------------------------------|---------------------------------------------------------------------------------|---------------------------------------------------------------------------------------------------|
| #1           | #2                                                | #3                                                                              | #4                                                                                                |
| Nurs*        | Advanced<br>Expert*<br>Practitioner*<br>Speciali* | Case-load*<br>Caseload*<br>Competenc*<br>Curriculum*<br>Education*<br>Knowledge | "Critical care"<br>"Critical nursing care"<br>ICU<br>"Intensive care"<br>"Intensive nursing care" |

## Supplementary file, INACTIC

|  |  |                                                                    |  |
|--|--|--------------------------------------------------------------------|--|
|  |  | Legislation*<br>"Policies"<br>"Policy"<br>Qualification*<br>Skill* |  |
|--|--|--------------------------------------------------------------------|--|

## #1 AND #2 AND #3 AND #4

Nurs\* AND (Advanced OR Expert\* OR Practitioner\* OR Speciali\*) AND (Case-load\* OR Caseload\* OR Competenc\* OR Curriculum\* OR Education\* OR Knowledge OR Legislation\* OR "Policies" OR "Policy" OR Qualification\* OR Skill\*) AND ("Critical care" OR "Critical nursing care" OR ICU OR "Intensive care" OR "Intensive nursing care")

= 501

**PICo 2**

| Participants                                                                                                                                                                                                                       | Phenomenon of Interest                                                                                                                                | Context                                                                                           |
|------------------------------------------------------------------------------------------------------------------------------------------------------------------------------------------------------------------------------------|-------------------------------------------------------------------------------------------------------------------------------------------------------|---------------------------------------------------------------------------------------------------|
| #1                                                                                                                                                                                                                                 | #2                                                                                                                                                    | #3                                                                                                |
| Advanced critical care practi*<br>Advanced nursing practi*<br>Advanced nurse practi*<br>Advanced practice nurs*<br>Expert critical care nurs*<br>Nurse practitioner*<br>Nurse specialist*<br>Specialist nurs*<br>Specialized nurs* | Case-load*<br>Caseload*<br>Competenc*<br>Curriculum*<br>Education*<br>Knowledge<br>Legislation*<br>"Policies"<br>"Policy"<br>Qualification*<br>Skill* | "Critical care"<br>"Critical nursing care"<br>ICU<br>"Intensive care"<br>"Intensive nursing care" |

## #1 AND #2 AND #3

(Advanced critical care practi\* OR Advanced nursing practi\* OR Advanced practice nurs\* OR Advanced nurse practi\* OR Expert critical care nurs\* OR Nurse practitioner\* OR Nurse specialist\* OR Specialist nurs\* OR Specialized nurs\*) AND (Case-load\* OR Caseload\* OR Competenc\* OR Curriculum\* OR Education\* OR Knowledge OR Legislation\* OR "Policies" OR "Policy" OR Qualification\* OR Skill\*) AND ("Critical care" OR "Critical nursing care" OR ICU OR "Intensive care" OR "Intensive nursing care")

= 144

**Summery**

PICo1 = 501

PICo2 = 144

PICo1 OR PICo2 = 501

**(PICo1 OR PICo2) AND Limiters - Published Date: 19920101-20191231 = 496**

PICo1 NOT PICo2 = 357

PICo2 NOT PICo1 = 0

Supplementary file, INACTIC

The default fields for unqualified searches consist of the following: Title, Translated Title, Classification Codes, Abstract, Keyword, Subjects, and Author

### CINAHL, EBSCOhost – 16-01-2019

#### PICo 1

| Participants |                                                   | Phenomenon of Interest                                                                                                                                                  | Context                                                                                                                                                        |
|--------------|---------------------------------------------------|-------------------------------------------------------------------------------------------------------------------------------------------------------------------------|----------------------------------------------------------------------------------------------------------------------------------------------------------------|
| #1           | #2                                                | #3                                                                                                                                                                      | #4                                                                                                                                                             |
| Nurs*        | Advanced<br>Expert*<br>Practitioner*<br>Speciali* | Case-load*<br>Caseload*<br>Competenc*<br>MH Curriculum+<br>Curriculum*<br>Education*<br>Knowledge<br>Legislation*<br>"Policies"<br>"Policy"<br>Qualification*<br>Skill* | "Critical care"<br>MH "Critical nursing care+"<br>"Critical nursing care"<br>ICU<br>MH "Intensive care units+"<br>"Intensive care"<br>"Intensive nursing care" |

#1 AND #2 AND #3 AND #4

Nurs\* AND (Advanced OR Expert\* OR Practitioner\* OR Speciali\*) AND (Case-load\* OR Caseload\* OR Competenc\* OR Curriculum\* MH "Curriculum+" OR Education\* OR Knowledge OR Legislation\* OR "Policies" OR "Policy" OR Qualification\* OR Skill\*) AND ("Critical care" OR MH "Critical nursing care+" OR "Critical nursing care" OR ICU OR MH "Intensive care units+" OR "Intensive care" OR "Intensive nursing care")

= 2215

#### PICo 2

| Participants                                                                                                                                                                                                                       |                                                                                                                                                                         | Phenomenon of Interest                                                                                                                                         | Context |
|------------------------------------------------------------------------------------------------------------------------------------------------------------------------------------------------------------------------------------|-------------------------------------------------------------------------------------------------------------------------------------------------------------------------|----------------------------------------------------------------------------------------------------------------------------------------------------------------|---------|
| #1                                                                                                                                                                                                                                 | #2                                                                                                                                                                      | #3                                                                                                                                                             | #3      |
| Advanced critical care practi*<br>Advanced nursing practi*<br>Advanced nurse practi*<br>Advanced practice nurs*<br>Expert critical care nurs*<br>Nurse practitioner*<br>Nurse specialist*<br>Specialist nurs*<br>Specialized nurs* | Case-load*<br>Caseload*<br>Competenc*<br>MH Curriculum+<br>Curriculum*<br>Education*<br>Knowledge<br>Legislation*<br>"Policies"<br>"Policy"<br>Qualification*<br>Skill* | "Critical care"<br>MH "Critical nursing care+"<br>"Critical nursing care"<br>ICU<br>MH "Intensive care units+"<br>"Intensive care"<br>"Intensive nursing care" |         |

#1 AND #2 AND #3

Supplementary file, INACTIC

(Advanced critical care practi\* OR Advanced nursing practi\* OR Advanced nurse practi\* OR Advanced practice nurs\* OR Expert critical care nurs\* OR Nurse practitioner\* Or Nurse specialist\* OR Specialist nurs\* Specialized nurs\*) AND (Case-load\* OR Caseload\* OR Competenc\* OR Curriculum\* MH "Curriculum+" OR Education\* OR Knowledge OR Legislation\* OR "Policies" OR "Policy" OR Qualification\* OR Skill\*) AND ("Critical care" OR MH "Critical nursing care+" OR "Critical nursing care" OR ICU OR MH "Intensive care units+" OR "Intensive care" OR "Intensive nursing care")  
= 911

### Summery

PICo1 = 2215

PICo2 = 911

PICo1 OR PICo2 = 2219

**(PICo1 OR PICo2) AND Limiters - Published Date: 19920101-20191231 = 2134**

PICo1 NOT PICo2 = 1308

PICo2 NOT PICo1 = 4

-----  
No field code=default title, abstract and subject heading search

### Cochrane Library\* – 22-01-2019

\*Cochrane Reviews, Cochrane Protocols, Trials, Clinical Answers, Editorials, Special collections

#### PICo 1

| Participants |                                                           | Phenomenon of Interest                                                                                                                                                  | Context                                                                                             |
|--------------|-----------------------------------------------------------|-------------------------------------------------------------------------------------------------------------------------------------------------------------------------|-----------------------------------------------------------------------------------------------------|
| #1           | #2                                                        | #3                                                                                                                                                                      | #4                                                                                                  |
| "Nurs*"      | "Advanced"<br>"Expert*"<br>"Practitioner*"<br>"Speciali*" | "Case-load*"<br>"Caseload*"<br>"Competenc*"<br>"Curriculum*"<br>"Education*"<br>"Knowledge"<br>"Legislation*"<br>"Policies"<br>"Policy"<br>"Qualification*"<br>"Skill*" | "Critical care"<br>"Critical nursing care"<br>"ICU"<br>"Intensive care"<br>"Intensive nursing care" |

#1 AND #2 AND #3 AND #4

"Nurs\*" AND ("Advanced" OR "Expert\*" OR "Practitioner\*" OR "Speciali\*") AND ("Case-load\*" OR "Caseload\*" OR "Competenc\*" OR "Curriculum\*" OR "Education\*" OR "Knowledge" OR "Legislation\*" OR "Policies" OR "Policy" OR "Qualification\*" OR "Skill\*") AND ("Critical care" OR "Critical nursing care" OR "ICU" OR "Intensive care" OR "Intensive nursing care")

= 106

Supplementary file, INACTIC

**PICo 2**

| Participants                                                                                                                                                                                                                                         | Phenomenon of Interest                                                                                                                                                  | Context                                                                                             |
|------------------------------------------------------------------------------------------------------------------------------------------------------------------------------------------------------------------------------------------------------|-------------------------------------------------------------------------------------------------------------------------------------------------------------------------|-----------------------------------------------------------------------------------------------------|
| #1                                                                                                                                                                                                                                                   | #2                                                                                                                                                                      | #3                                                                                                  |
| "Advanced critical care practi*"<br>"Advanced nursing practi*"<br>"Advanced nurse practi*"<br>"Advanced practice nurs*"<br>"Expert critical care nurs*"<br>"Nurse practitioner*"<br>"Nurse specialist*"<br>"Specialist nurs*"<br>"Specialized nurs*" | "Case-load*"<br>"Caseload*"<br>"Competenc*"<br>"Curriculum*"<br>"Education*"<br>"Knowledge"<br>"Legislation*"<br>"Policies"<br>"Policy"<br>"Qualification*"<br>"Skill*" | "Critical care"<br>"Critical nursing care"<br>"ICU"<br>"Intensive care"<br>"Intensive nursing care" |

#1 AND #2 AND #3

("Advanced critical care practi\*" OR "Advanced nursing practi\*" OR "Advanced practice nurs\*" OR "Advanced nurse practi\*" OR "Expert critical care nurs\*" OR "Nurse practitioner\*" OR "Nurse specialist\*" OR "Specialist nurs\*" OR "Specialized nurs\*") AND ("Case-load\*" OR "Caseload\*" OR "Competenc\*" OR "Curriculum\*" OR "Education\*" OR "Knowledge" OR "Legislation\*" OR "Policies" OR "Policy" OR "Qualification\*" OR "Skill\*") AND ("Critical care" OR "Critical nursing care" OR "ICU" OR "Intensive care" OR "Intensive nursing care")

= 34

**Summery**

PICo1 = 106

PICo2 = 34

PICo1 OR PICo2 = 126

**PICo1 OR PICo2 with Cochrane Library publication date from Jan 1992 to Dec 2019 = 126**

PICo1 NOT PICo2 = 92

PICo2 NOT PICo1 = 20

**Searching with Field Labels**

Limit to specific fields using the following field labels.

If NO field label is used, "All text" will be searched. All text search DOES NOT include references.

<https://www.cochranelibrary.com/advanced-search/search-manager>

**SweMed+ – 16-01-2019****PICo 1**

| Participants | Phenomenon of Interest | Context |
|--------------|------------------------|---------|
|--------------|------------------------|---------|

## Supplementary file, INACTIC

| #1                   | #2                                                       | #3                                                                                                                                                              | #4                                                                                                  |
|----------------------|----------------------------------------------------------|-----------------------------------------------------------------------------------------------------------------------------------------------------------------|-----------------------------------------------------------------------------------------------------|
| "Nurse"<br>"Nursing" | "Advanced"<br>"Expert"<br>"Practitioner"<br>"Specialist" | "Case-load"<br>"Caseload"<br>"Competenc"<br>"Curriculum"<br>"Education"<br>"Knowledge"<br>"Legislation"<br>"Policies"<br>"Policy"<br>"Qualification"<br>"Skill" | "Critical care"<br>"Critical nursing care"<br>"ICU"<br>"Intensive care"<br>"Intensive nursing care" |

## #1 AND #2 AND #3 AND #4

("Nurse" OR "Nursing") AND ("Advanced" OR "Expert" OR "Practitioner" OR "Specialist") AND ("Case-load" OR "Caseload" OR "Competence" OR "Curriculum" OR "Education" OR "Knowledge" OR "Legislation" OR "Policies" OR "Policy" OR "Qualification" OR "Skill") AND ("Critical care" OR "Critical nursing care" OR "ICU" OR "Intensive care" OR "Intensive nursing care")

= 8

**PICo 2**

| Participants                                                                                                                                                                                                                                                                                                                                                                        | Phenomenon of Interest                                                                                                                                           | Context                                                                                             |
|-------------------------------------------------------------------------------------------------------------------------------------------------------------------------------------------------------------------------------------------------------------------------------------------------------------------------------------------------------------------------------------|------------------------------------------------------------------------------------------------------------------------------------------------------------------|-----------------------------------------------------------------------------------------------------|
| #1                                                                                                                                                                                                                                                                                                                                                                                  | #2                                                                                                                                                               | #3                                                                                                  |
| "Advanced critical care practitioner"<br>"Advanced nursing practitioner"<br>"Advanced nurse practitioner"<br>"Advanced practice nurse"<br>"Advanced practice nursing"<br>"Expert critical care nurse"<br>"Expert critical care nursing"<br>"Nurse practitioner"<br>"Nurse specialist"<br>"Specialist nurse"<br>"Specialist nursing"<br>"Specialized nurse"<br>"Specialized nursing" | "Case-load"<br>"Caseload"<br>"Competence"<br>"Curriculum"<br>"Education"<br>"Knowledge"<br>"Legislation"<br>"Policies"<br>"Policy"<br>"Qualification"<br>"Skill" | "Critical care"<br>"Critical nursing care"<br>"ICU"<br>"Intensive care"<br>"Intensive nursing care" |

## #1 AND #2 AND #3

("Advanced critical care practitioner" OR "Advanced nursing practitioner" OR "Advanced nurse practitioner" OR "Advanced practice nurse" OR "Advanced practice nursing" OR "Expert critical care nurse" OR "Expert critical care nursing" OR "Nurse practitioner" OR "Nurse specialist" OR "Specialist nurse" OR "Specialist nursing" OR "Specialized nurse" OR "Specialized nursing") AND ("Case-load" OR "Caseload" OR "Competence" OR "Curriculum" OR "Education" OR "Knowledge" OR "Legislation" OR "Policies" OR "Policy" OR "Qualification" OR "Skill") AND ("Critical care" OR "Critical nursing care" OR "ICU" OR "Intensive care" OR "Intensive nursing care")

= 3

**Summery**



Supplementary file, INACTIC

PICo1 = 8

PICo2 = 3

PICo1 OR PICo2 = 9

**(PICo1 OR PICo2) AND year:[1992 TO 2018] = 9**

PICo1 NOT PICo2 = 6

PICo2 NOT PICo1 = 1

### Scopus – 16-01-2019

#### PICo 1

| Participants |                                                           | Phenomenon of Interest                                                                                                                                                  | Context                                                                                             |
|--------------|-----------------------------------------------------------|-------------------------------------------------------------------------------------------------------------------------------------------------------------------------|-----------------------------------------------------------------------------------------------------|
| #1           | #2                                                        | #3                                                                                                                                                                      | #4                                                                                                  |
| "Nurs*"      | "Advanced"<br>"Expert*"<br>"Practitioner*"<br>"Speciali*" | "Case-load*"<br>"Caseload*"<br>"Competenc*"<br>"Curriculum*"<br>"Education*"<br>"Knowledge"<br>"Legislation*"<br>"Policies"<br>"Policy"<br>"Qualification*"<br>"Skill*" | "Critical care"<br>"Critical nursing care"<br>"ICU"<br>"Intensive care"<br>"Intensive nursing care" |

#1 AND #2 AND #3 AND #4

TITLE-ABS-KEY("Nurs\*" AND ("Advanced" OR "Expert\*" OR "Practitioner\*" OR "Speciali\*") AND ("Case-load\*" OR "Caseload\*" OR "Competenc\*" OR "Curriculum\*" OR "Education\*" OR "Knowledge" OR "Legislation\*" OR "Policies" OR "Policy" OR "Qualification\*" OR "Skill\*") AND ("Critical care" OR "Critical nursing care" OR "ICU" OR "Intensive care" OR "Intensive nursing care"))

= 2651

#### PICo 2

| Participants                                                                                                                                                                                                                                         | Phenomenon of Interest                                                                                                                                                  | Context                                                                                             |
|------------------------------------------------------------------------------------------------------------------------------------------------------------------------------------------------------------------------------------------------------|-------------------------------------------------------------------------------------------------------------------------------------------------------------------------|-----------------------------------------------------------------------------------------------------|
| #1                                                                                                                                                                                                                                                   | #2                                                                                                                                                                      | #3                                                                                                  |
| "Advanced critical care practi*"<br>"Advanced nursing practi*"<br>"Advanced nurse practi*"<br>"Advanced practice nurs*"<br>"Expert critical care nurs*"<br>"Nurse practitioner*"<br>"Nurse specialist*"<br>"Specialist nurs*"<br>"Specialized nurs*" | "Case-load*"<br>"Caseload*"<br>"Competenc*"<br>"Curriculum*"<br>"Education*"<br>"Knowledge"<br>"Legislation*"<br>"Policies"<br>"Policy"<br>"Qualification*"<br>"Skill*" | "Critical care"<br>"Critical nursing care"<br>"ICU"<br>"Intensive care"<br>"Intensive nursing care" |

Supplementary file, INACTIC

#1 AND #2 AND #3

TITLE-ABS-KEY(("Advanced critical care practi\*" OR "Advanced nursing practi\*" OR "Advanced practice nurs\*" OR "Advanced nurse practi\*" OR "Expert critical care nurs\*" OR "Nurse practitioner\*" OR "Nurse specialist\*" OR "Specialist nurs\*" OR "Specialized nurs\*") AND ("Case-load\*" OR "Caseload\*" OR "Competenc\*" OR "Curriculum\*" OR "Education\*" OR "Knowledge" OR "Legislation\*" OR "Policies" OR "Policy" OR "Qualification\*" OR "Skill\*") AND ("Critical care" OR "Critical nursing care" OR "ICU" OR "Intensive care" OR "Intensive nursing care"))

= 875

### Summery

PICo1 = 2651

PICo2 = 875

PICo1 OR PICo2 = 2653

**(PICo1 OR PICo2) AND PUBYEAR AFT 1991 = 2463**

PICo1 NOT PICo2 = 1778

PICo2 NOT PICo1 = 2

TITLE-ABS-KEY = A combined field that searches abstracts, keywords, and document titles

## Education Resources Information Center (ERIC) – 16-01-2019

### PICo 1

| Participants         |                                                          | Phenomenon of Interest                                                                                                                                          | Context                                                                                             |
|----------------------|----------------------------------------------------------|-----------------------------------------------------------------------------------------------------------------------------------------------------------------|-----------------------------------------------------------------------------------------------------|
| #1                   | #2                                                       | #3                                                                                                                                                              | #4                                                                                                  |
| "Nurse"<br>"Nursing" | "Advanced"<br>"Expert"<br>"Practitioner"<br>"Specialist" | "Case-load"<br>"Caseload"<br>"Competenc"<br>"Curriculum"<br>"Education"<br>"Knowledge"<br>"Legislation"<br>"Policies"<br>"Policy"<br>"Qualification"<br>"Skill" | "Critical care"<br>"Critical nursing care"<br>"ICU"<br>"Intensive care"<br>"Intensive nursing care" |

#1 AND #2 AND #3 AND #4

("Nurse" OR "Nursing") AND ("Advanced" OR "Expert" OR "Practitioner" OR "Specialist") AND ("Case-load" OR "Caseload" OR "Competence" OR "Curriculum" OR "Education" OR "Knowledge" OR "Legislation" OR "Policies" OR "Policy" OR "Qualification" OR "Skill") AND ("Critical care" OR "Critical nursing care" OR "ICU" OR "Intensive care" OR "Intensive nursing care")

= 14

### PICo 2

## Supplementary file, INACTIC

| Participants                                                                                                                                                                                                                                                                                                                                                                        | Phenomenon of Interest                                                                                                                                           | Context                                                                                             |
|-------------------------------------------------------------------------------------------------------------------------------------------------------------------------------------------------------------------------------------------------------------------------------------------------------------------------------------------------------------------------------------|------------------------------------------------------------------------------------------------------------------------------------------------------------------|-----------------------------------------------------------------------------------------------------|
| #1                                                                                                                                                                                                                                                                                                                                                                                  | #2                                                                                                                                                               | #3                                                                                                  |
| "Advanced critical care practitioner"<br>"Advanced nursing practitioner"<br>"Advanced nurse practitioner"<br>"Advanced practice nurse"<br>"Advanced practice nursing"<br>"Expert critical care nurse"<br>"Expert critical care nursing"<br>"Nurse practitioner"<br>"Nurse specialist"<br>"Specialist nurse"<br>"Specialist nursing"<br>"Specialized nurse"<br>"Specialized nursing" | "Case-load"<br>"Caseload"<br>"Competence"<br>"Curriculum"<br>"Education"<br>"Knowledge"<br>"Legislation"<br>"Policies"<br>"Policy"<br>"Qualification"<br>"Skill" | "Critical care"<br>"Critical nursing care"<br>"ICU"<br>"Intensive care"<br>"Intensive nursing care" |

## #1 AND #2 AND #3

("Advanced critical care practitioner" OR "Advanced nursing practitioner" OR "Advanced nurse practitioner" OR "Advanced practice nurse" OR "Advanced practice nursing" OR "Expert critical care nurse" OR "Expert critical care nursing" OR "Nurse practitioner" OR "Nurse specialist" OR "Specialist nurse" OR "Specialist nursing" OR "Specialized nurse" OR "Specialized nursing") AND ("Case-load" OR "Caseload" OR "Competence" OR "Curriculum" OR "Education" OR "Knowledge" OR "Legislation" OR "Policies" OR "Policy" OR "Qualification" OR "Skill") AND ("Critical care" OR "Critical nursing care" OR "ICU" OR "Intensive care" OR "Intensive nursing care")  
= 7

## PICo1 AND PICo2

((("Nurse" OR "Nursing") AND ("Advanced" OR "Expert" OR "Practitioner" OR "Specialist")) AND ("Case-load" OR "Caseload" OR "Competence" OR "Curriculum" OR "Education" OR "Knowledge" OR "Legislation" OR "Policies" OR "Policy" OR "Qualification" OR "Skill")) AND ("Critical care" OR "Critical nursing care" OR "ICU" OR "Intensive care" OR "Intensive nursing care")) OR (("Advanced critical care practitioner" OR "Advanced nursing practitioner" OR "Advanced nurse practitioner" OR "Advanced practice nurse" OR "Advanced practice nursing" OR "Expert critical care nurse" OR "Expert critical care nursing" OR "Nurse practitioner" OR "Nurse specialist" OR "Specialist nurse" OR "Specialist nursing" OR "Specialized nurse" OR "Specialized nursing") AND ("Case-load" OR "Caseload" OR "Competence" OR "Curriculum" OR "Education" OR "Knowledge" OR "Legislation" OR "Policies" OR "Policy" OR "Qualification" OR "Skill")) AND ("Critical care" OR "Critical nursing care" OR "ICU" OR "Intensive care" OR "Intensive nursing care"))  
= 16

## Summery

PICo1 = 14

PICo2 = 7

PICo1 OR PICo2 = 16

**(PICo1 OR PICo2) AND (pubyear:1992 OR pubyear:1993 OR ...) = 11**

PICo1 NOT PICo2 = --

PICo2 NOT PICo1 = --

Supplementary file, INACTIC

ERIC will look for your search terms across a set of key ERIC fields: title, author, source, abstract and descriptor

<https://eric.ed.gov/?advanced>

### Social Sciences Citation Index (SSCI) – 16-01-2019

#### PICo 1

| Participants |                                                           | Phenomenon of Interest                                                                                                                                                  | Context                                                                                             |
|--------------|-----------------------------------------------------------|-------------------------------------------------------------------------------------------------------------------------------------------------------------------------|-----------------------------------------------------------------------------------------------------|
| #1           | #2                                                        | #3                                                                                                                                                                      | #4                                                                                                  |
| "Nurs*"      | "Advanced"<br>"Expert*"<br>"Practitioner*"<br>"Speciali*" | "Case-load*"<br>"Caseload*"<br>"Competenc*"<br>"Curriculum*"<br>"Education*"<br>"Knowledge"<br>"Legislation*"<br>"Policies"<br>"Policy"<br>"Qualification*"<br>"Skill*" | "Critical care"<br>"Critical nursing care"<br>"ICU"<br>"Intensive care"<br>"Intensive nursing care" |

#1 AND #2 AND #3 AND #4

TS=("Nurs\*" AND ("Advanced" OR "Expert\*" OR "Practitioner\*" OR "Speciali\*") AND ("Case-load\*" OR "Caseload\*" OR "Competenc\*" OR "Curriculum\*" OR "Education\*" OR "Knowledge" OR "Legislation\*" OR "Policies" OR "Policy" OR "Qualification\*" OR "Skill\*") AND ("Critical care" OR "Critical nursing care" OR "ICU" OR "Intensive care" OR "Intensive nursing care"))

= 565

#### PICo 2

| Participants                                                                                                                                                                                                                                         |                                                                                                                                                                         | Phenomenon of Interest                                                                              | Context |
|------------------------------------------------------------------------------------------------------------------------------------------------------------------------------------------------------------------------------------------------------|-------------------------------------------------------------------------------------------------------------------------------------------------------------------------|-----------------------------------------------------------------------------------------------------|---------|
| #1                                                                                                                                                                                                                                                   | #2                                                                                                                                                                      | #3                                                                                                  | #3      |
| "Advanced critical care practi*"<br>"Advanced nursing practi*"<br>"Advanced nurse practi*"<br>"Advanced practice nurs*"<br>"Expert critical care nurs*"<br>"Nurse practitioner*"<br>"Nurse specialist*"<br>"Specialist nurs*"<br>"Specialized nurs*" | "Case-load*"<br>"Caseload*"<br>"Competenc*"<br>"Curriculum*"<br>"Education*"<br>"Knowledge"<br>"Legislation*"<br>"Policies"<br>"Policy"<br>"Qualification*"<br>"Skill*" | "Critical care"<br>"Critical nursing care"<br>"ICU"<br>"Intensive care"<br>"Intensive nursing care" |         |

#1 AND #2 AND #3

Supplementary file, INACTIC

TS=(("Advanced critical care practi\*" OR "Advanced nursing practi\*" OR "Advanced practice nurs\*" OR "Advanced nurse practi\*" OR "Expert critical care nurs\*" OR "Nurse practitioner\*" OR "Nurse specialist\*" OR "Specialist nurs\*" OR "Specialized nurs\*") AND ("Case-load\*" OR "Caseload\*" OR "Competenc\*" OR "Curriculum\*" OR "Education\*" OR "Knowledge" OR "Legislation\*" OR "Policies" OR "Policy" OR "Qualification\*" OR "Skill\*") AND ("Critical care" OR "Critical nursing care" OR "ICU" OR "Intensive care" OR "Intensive nursing care"))  
= 150

**Summery**

PICo1 = 565

PICo2 = 150

PICo1 OR PICo2 = 567

**(PICo1 OR PICo2) AND Timespan=1992-2019 = 567**

PICo1 NOT PICo2 = 417

PICo2 NOT PICo1 = 2

---

TS=Topic

Searches for topic terms in the following fields within a record:

Title  
Abstract  
Author Keywords  
Keywords Plus®

---
